# Supplementary material for: AFM study of oxygen reduction products on HOPG in the LiPF6–DMSO electrolyte
Source: Royal Society of Chemistry journal article supplement (doi:10.1039/c3cp54621g), 2013-12-18

## SUPPLEMENTARY INFORMATION

### AFM Study of Oxygen Reduction Products on HOPG in $\text{LiPF}_6$ DMSO electrolyte

Santiago E. Herrera,<sup>a</sup> Alvaro Y. Tesio<sup>a</sup>, Romain Clarenc<sup>a</sup> and Ernesto J. Calvo<sup>a\*</sup>

S1. Electrochemical AFM cell

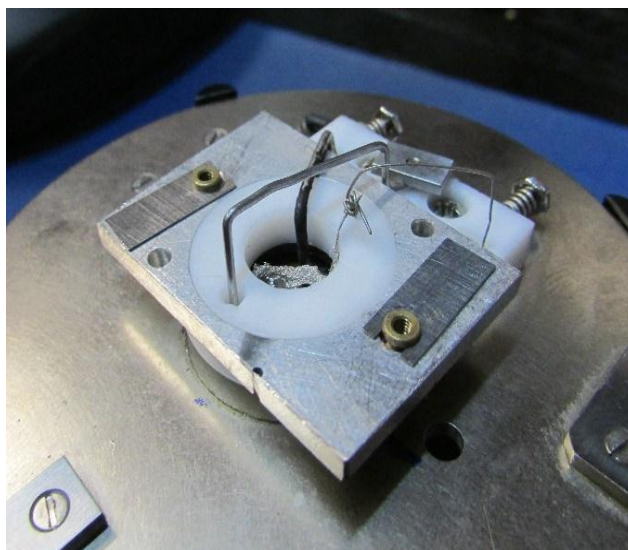

S2. Blank AFM of the HOPG surface. Notice small particles smaller than the lithium peroxide deposit that arise from solvent and molecular sieves used in the solvent purification.

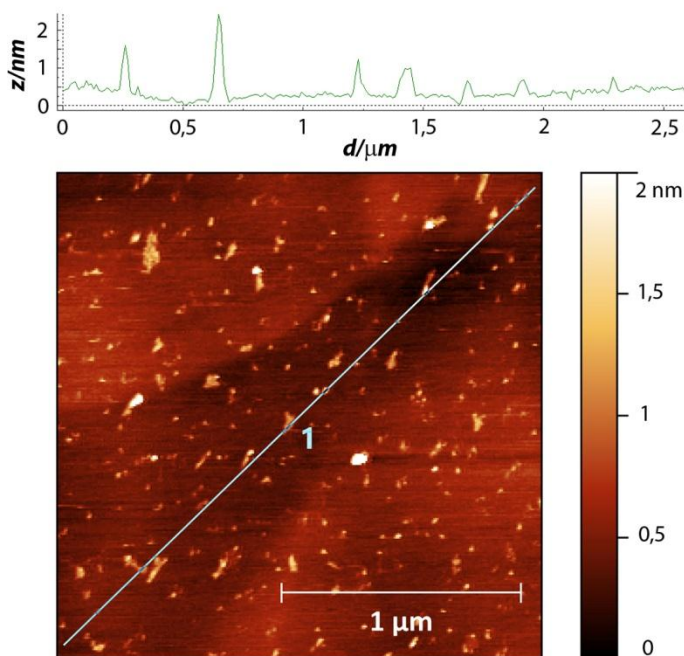

Supplement: c3cp54621g.pdf [file c3cp54621g.pdf]
